# Supplementary material for: Suppression of abnormal α-synuclein expression by activation of BDNF transcription ameliorates Parkinson’s disease-like pathology
Source: PubMed Central journal article supplement — Mol Ther Nucleic Acids. 2022 Jun 1;29:1–15. doi: 10.1016/j.omtn.2022.05.037 (PMC9207554; doi:10.1016/j.omtn.2022.05.037), 2022-06-01
Supplement: mmc1.pdf [file mmc1.pdf]

OMTN, Volume 29

## **Supplemental information**

**Suppression of abnormal  $\alpha$ -synuclein expression**

**by activation of BDNF transcription ameliorates**

**Parkinson's disease-like pathology**

**Qianqian Cao, Shilin Luo, Wei Yao, Youge Qu, Nanbu Wang, Jian Hong, Shigeo Murayama, Zhentao Zhang, Jiayu Chen, Kenji Hashimoto, Qi Qi, and Ji-chun Zhang**

Supplemental Information  
Supplement

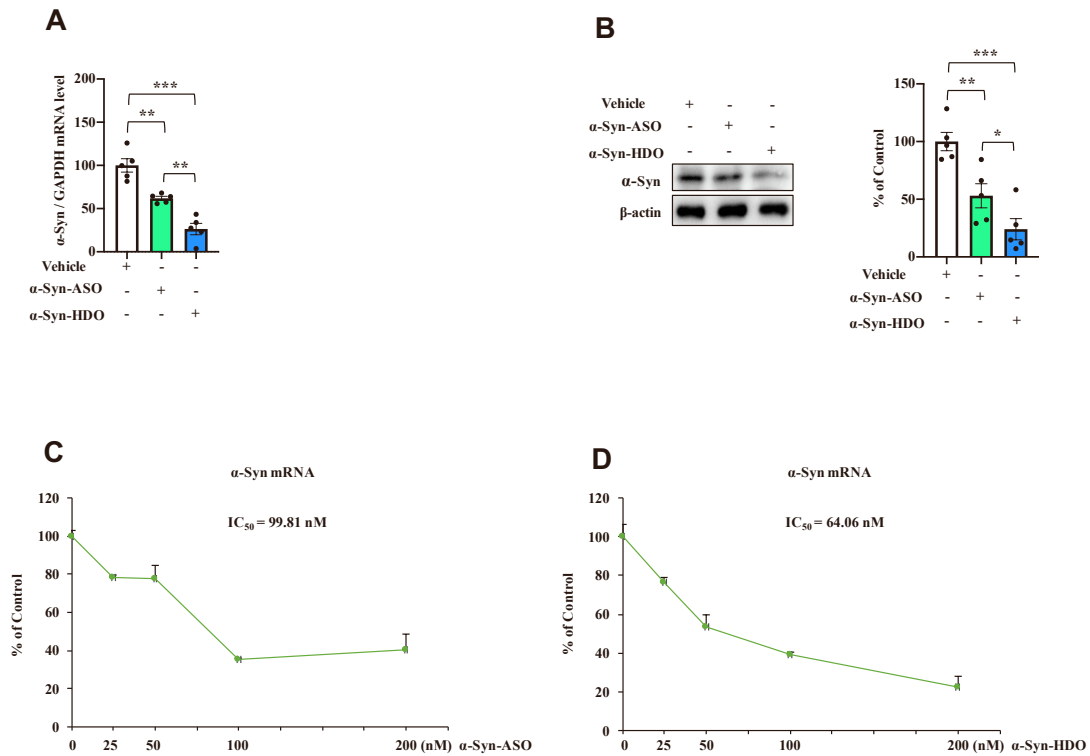

**Supplement figure 1.  $\alpha$ -Syn-HDO exerted a more potent silencing effect on  $\alpha$ -Syn than  $\alpha$ -Syn-ASO.** **A:** qPCR analysis of  $\alpha$ -Syn in SH-SY5Y cells treated with  $\alpha$ -Syn-ASO or  $\alpha$ -Syn-HDO. (Mean  $\pm$  SEM, n = 5 per group, Student's *t*-test, \**p* < 0.05). **B:** Western blot assay for  $\alpha$ -Syn in SH-SY5Y cells after  $\alpha$ -Syn-ASO or  $\alpha$ -Syn-HDO administration. (Mean  $\pm$  SEM, n = 5 per group, one-way ANOVA, \**p* < 0.05 and \*\**p* < 0.01). **C** and **D:** The  $IC_{50}$  for  $\alpha$ -Syn in SH-SY5Y cells treated with  $\alpha$ -Syn-ASO or  $\alpha$ -Syn-HDO. (Mean  $\pm$  SEM, n = 5 per group)

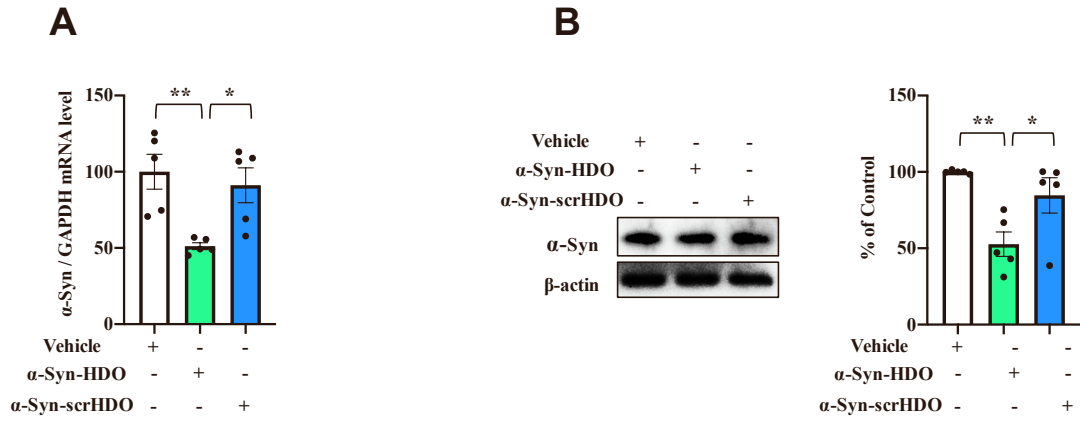

**Supplement figure 2. The scrambled  $\alpha$ -Syn-HDO did not show any silencing effects for  $\alpha$ -Syn. A:** qPCR analysis of  $\alpha$ -Syn in SH-SY5Y cells after  $\alpha$ -Syn-HDO or scrambled  $\alpha$ -Syn-HDO ( $\alpha$ -Syn-scrHDO) administration. (Mean  $\pm$  SEM, n = 5 per group, one-way ANOVA, \* $p$  < 0.05 and \*\* $p$  < 0.01). **B:** Western blot assay for  $\alpha$ -Syn in SH-SY5Y cells after  $\alpha$ -Syn-HDO or  $\alpha$ -Syn-scrHDO administration. (Mean  $\pm$  SEM, n = 5 per group, one-way ANOVA, \* $p$  < 0.05 and \*\* $p$  < 0.01)

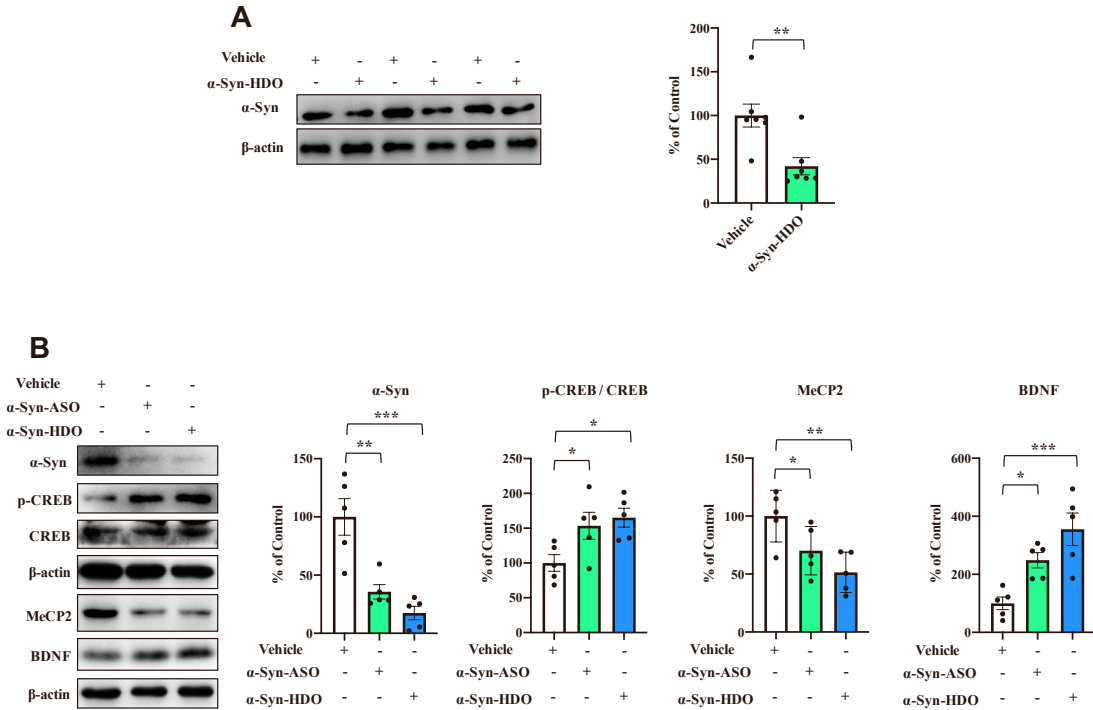

**Supplement figure 3.  $\alpha$ -Syn-HDO silenced  $\alpha$ -Syn expression in SNc of WT mice and promoted BDNF upregulation.** **A:** Western blot assay for  $\alpha$ -Syn in SNc of WT mice after  $\alpha$ -Syn-HDO administration. (Mean  $\pm$  SEM,  $n = 7$  per group, Student's  $t$ -test,  $**p < 0.01$ ). **B:** Western blot assay for  $\alpha$ -Syn; the ratio of p-CREB/CREB; MeCP2 and BDNF in SNc of WT mice after  $\alpha$ -Syn-HDO administration. (Mean  $\pm$  SEM,  $n = 5$  per group, one-way ANOVA,  $*p < 0.05$ ,  $**p < 0.01$  and  $***p < 0.001$ ).

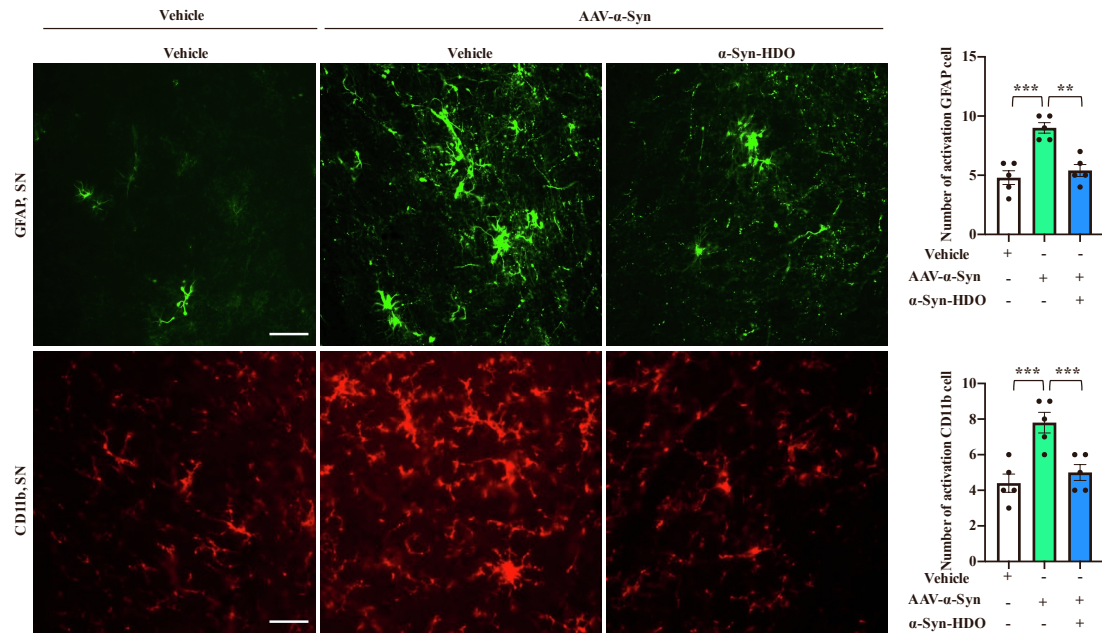

**Supplement figure 4.  $\alpha$ -Syn-HDO attenuates GFAP and CD11b immunoreactivity in AAV9-hSyn-human SNCA-treated mice.** The immunofluorescence staining for GFAP and CD11b in the SNc. Quantification analysis of GFAP and CD11b (Mean  $\pm$  SEM, n = 5 per group, one-way ANOVA, \*\* $p$  < 0.01 and \*\*\* $p$  < 0.001). Scale bar = 50  $\mu$ m.

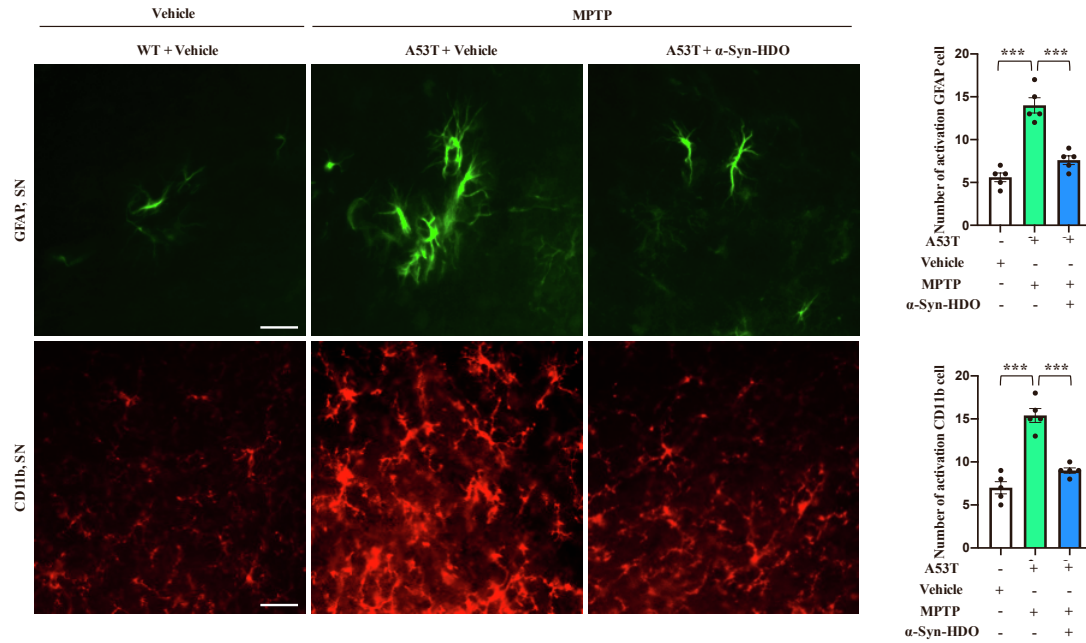

**Supplement figure 5  $\alpha$ -Syn-HDO attenuates GFAP and CD11b immunoreactivity in MPTP-treated  $\alpha$ -Syn-A53T mice.** The immunofluorescence staining for GFAP and CD11b in the SNc. Quantification analysis of GFAP and CD11b (Mean  $\pm$  SEM, n = 5 per group, one-way ANOVA, \*\*\* $p$  < 0.001). Scale bar = 50  $\mu$ m.

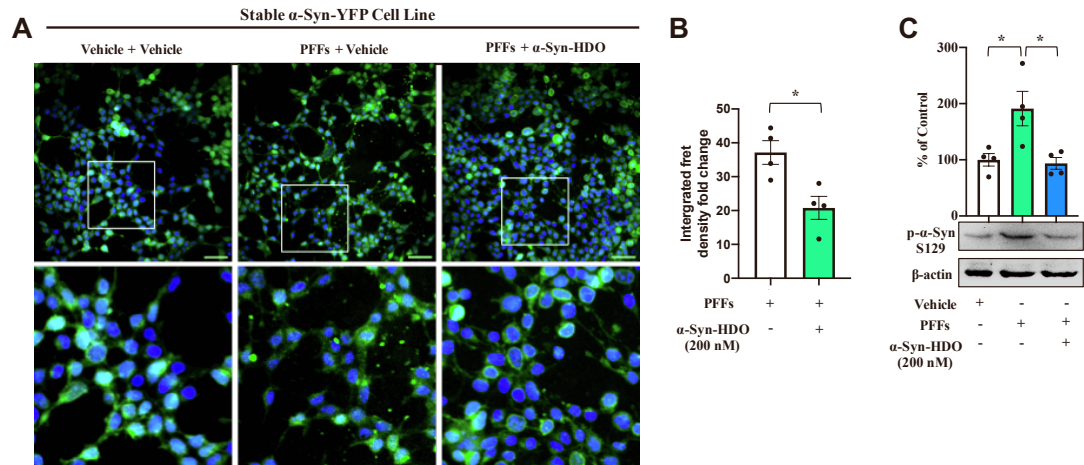

**Supplement figure 6.  $\alpha$ -Syn-HDO prevents  $\alpha$ -Syn-induced PD pathology *in vitro*.**

**A** and **B**: Representative images of  $\alpha$ -Syn aggregation in HEK293- $\alpha$ -Syn cells treated with PFFs in the presence or absence of  $\alpha$ -Syn-HDO (mean  $\pm$  SEM,  $n = 4$  per group, Student's  $t$ -test,  $**p < 0.01$ ). Green fluorescence spots represent abnormally aggregated  $\alpha$ -Syn. Scale bar = 50  $\mu$ m. **C**: HEK293- $\alpha$ -Syn cells were treated with or without PFFs in the presence of vehicle or  $\alpha$ -Syn-HDO. Western blotting was used to examine the expression of p- $\alpha$ -Syn (S129) after 24 hours of transfection (mean  $\pm$  SEM,  $n = 4$  per group, one-way ANOVA,  $*p < 0.05$ ).

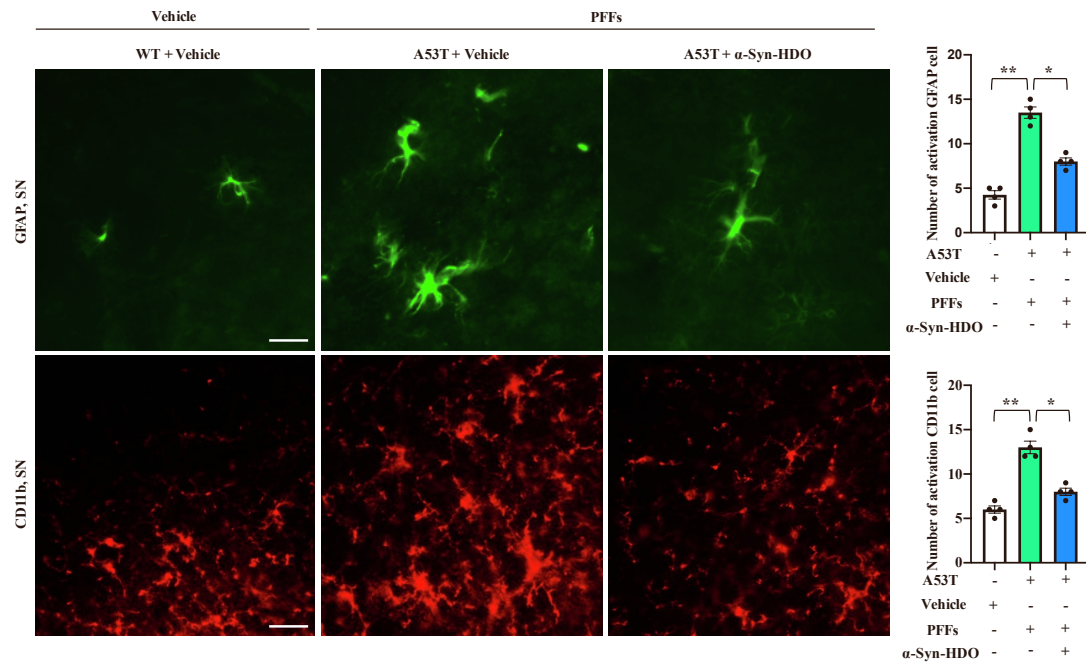

**Supplement figure 7.  $\alpha$ -Syn-HDO attenuates GFAP and CD11b immunoreactivity in PFFs-treated  $\alpha$ -Syn-A53T mice.** The immunofluorescence staining for GFAP and CD11b in the SNc. Quantification analysis of GFAP and CD11b (Mean  $\pm$  SEM, n = 4 per group, one-way ANOVA, \* $p$  < 0.05 and \*\* $p$  < 0.01). Scale bar = 50  $\mu$ m.
